# Supplementary material for: Affinity of Serum Albumin and Fibrinogen to Cellulose, Its Hydrophobic Derivatives and Blends
Source: Front Chem. 2019 Sep 6;7:581. doi: 10.3389/fchem.2019.00581 (PMC6743410; doi:10.3389/fchem.2019.00581)
Supplement: Supplementary file 1 [file Data_Sheet_1.docx]

**Supplementary material**

Affinity of serum albumin and fibrinogen to cellulose, its hydrophobic derivatives and blends

Rupert Kargl1,2,*, Matej Bračič1, Matic Resnik3, Miran Mozetič3, Wolfgang Bauer2, Karin Stana Kleinschek1,4, Tamilselvan Mohan1

1Laboratory for Characterization and Processing of Polymers, Faculty of Mechanical Engineering, University of Maribor, Smetanova ulica 17, Maribor, Slovenia.

2Institute of Paper, Pulp and Fibre Technology (IPZ), Graz University of Technology, Inffeldgasse 23, A-8010 Graz, Austria.

3Department of Surface Engineering and Optoelectronics, Jožef Stefan Institute, Jamova cesta 39, SI-1000 Ljubljana, Slovenia.

4Institute of Inorganic Chemistry, Graz University of Technology, Stremayrgasse 9/V, A-8010 Graz, Austria.

*** Correspondence:**Corresponding Author
rupert.kargl@um.si

Keywords: cellulose acetate, ethyl cellulose, fibrinogen, albumin, hydrophilicity, quartz crystal microbalance, protein adsorption





**Figure S1:** QCM-D frequency and dissipation change (*f3, f5, f7, f9, f11*) during rinsing with 0.1 and 10 mg ml-1 bovine serum albumin (BSA) over cellulose (CE), cellulose acetate (CA), and ethyl cellulose (EC) in PBS followed by rinsing with PBS and water.





**Figure S2:** QCM-D frequency and dissipation change (*f3, f5, f7, f9, f11*) during rinsing with 0.1 and 10 mg ml-1 bovine serum albumin (BSA) over cellulose (CE), cellulose acetate (CA), and ethyl cellulose (EC) 50:50 wt.% blends (CE-CA; CE-EC; CA-EC) in PBS followed by rinsing with PBS and water.

**

**

**Figure S3:** QCM-D frequency and dissipation change (*f3, f5, f7, f9, f11*) during rinsing with 0.1 and 1 mg ml-1 fibrinogen (FIB) from bovine plasma over cellulose (CE), cellulose acetate (CA), and ethyl cellulose (EC) in PBS followed by rinsing with PBS and water.

**

**

**Figure S4:** QCM-D frequency and dissipation change (*f3, f5, f7, f9, f11*) during rinsing with 0.1 and 1 mg ml-1 fibrinogen (FIB) from bovine plasma over cellulose (CE), cellulose acetate (CA), and ethyl cellulose (EC) 50:50 wt.% blends (CE-CA; CE-EC; CA-EC) in PBS followed by rinsing with PBS and water.
